# Supplementary material for: Heterogeneity revealed by integrated genomic analysis uncovers a molecular switch in malignant uveal melanoma
Source: PubMed Central journal article supplement (PMC4741968; doi:10.18632/oncotarget.5637), 2015-10-08
Supplement: oncotarget-06-37824-s001.pdf [file oncotarget-06-37824-s001.pdf]

SUPPLEMENTARY FIGURES AND TABLES

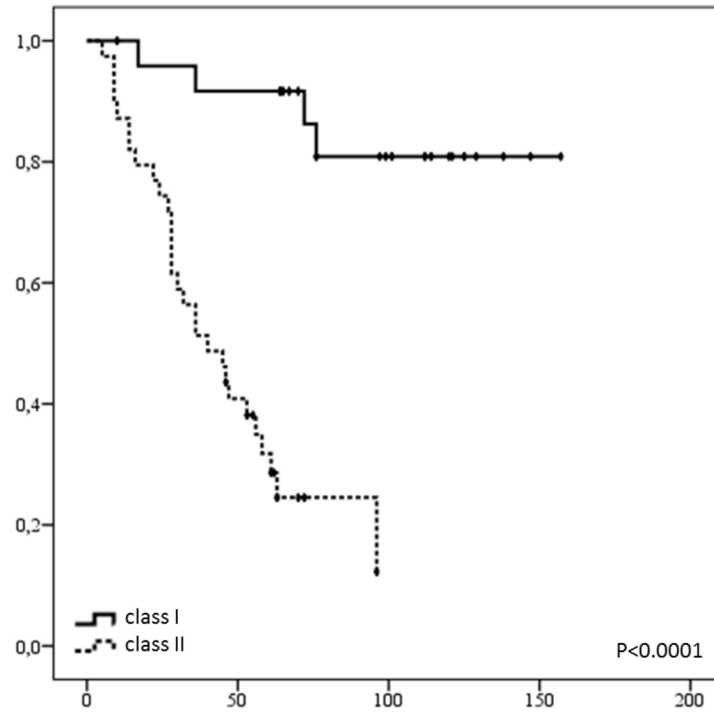

Supplementary Figure S1: Kaplan-Meier analysis revealed a clear difference in survival between class I and class II.

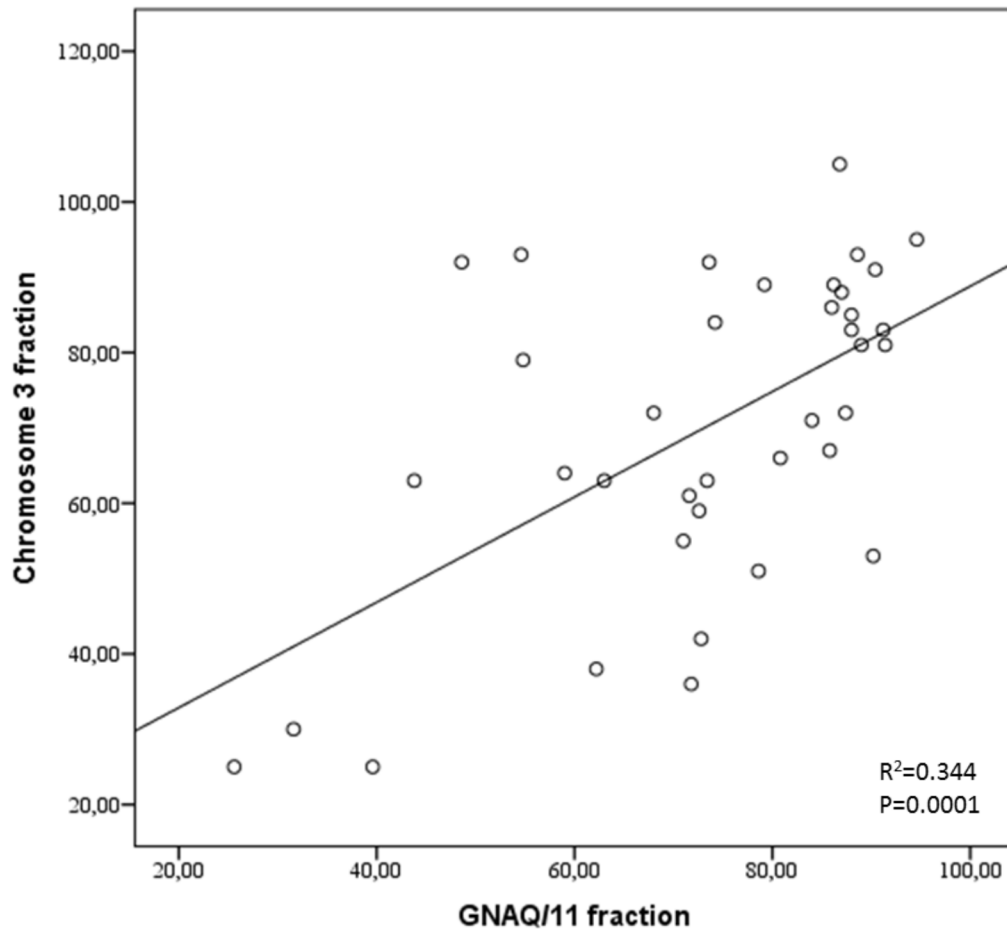

**Supplementary Figure S2: Correlation between fraction of tumor cells containing a GNAQ/11 mutation and fraction of tumor cells containing monosomy 3.** A significant correlation indicates that monosomy 3 fraction can be used to determine tumor cell fraction in tumors which lack a GNAQ/11 mutation.

**Supplementary Table S1: dPCR sequences context**

| Assay      | MiQE Context Sequence                                                                                                              |
|------------|------------------------------------------------------------------------------------------------------------------------------------|
| GNAQ Q209  | AGTGTATCCATTTTCTTCTCTCTGACCTTTGGCCCCCTACATCGACCATTCTGCAAGGTTAA<br>CAATACTCATATTAATAACATATAAAGTAAAAGTAAAAAGTCAACATAAATATAGCACTAC    |
| GNA11 Q209 | CTTTCAGGATGGTGGATGTGGGGGGCCAGCGGTCGGAGCGGAGGAAGTGGATCCACTGCTTT<br>GAGAACGTGACATCCATCATGTTTCTCGTCGCCCTCAGCGAATACGACCAAGTCCTGGTGG    |
| TERT       | CACCCCTTGGTGGCGGCTCACCTGTACGCCTGCAGCAGGAGGATCTTGTAGATGTTGGTGCA<br>CACCGTCTGGAGGCTGTTACCTAGAGTCGCCAAGAAAGAGTGAGAAACGGTAGAAACCTC     |
| PPARG      | TCTCCACCTTATTATTCTGAGAAGACTCAGCTCTACAATAAGCCTCATGAAGAGCCTTCCAAC<br>TCCCTCATGGCAATTGAATGTCGTGCTGTGGAGATAAAGCTTCTGGATTTCACTATGGA     |
| PTK2       | CAACCAGATGGTCATTCAAAAAAGTTGGAGCTGTAAGTGCTGGCGACTGAGGACACAGGGTT<br>AATTCCTCGCTGCTGGTGGAAGGCTAGAGAACATCTTCAAAAGAGGGTAGCAAGACGTGCT    |
| CDC42      | TTCACACACTTAGCTTTTTTTTTGTGATGAGAACATTTAAAATATACTCACTTAGCAATTTTCAA<br>GTGTGTAATACCGTATTATTAATACTATAGTCACCATGCTGTACGGTAGCTCTCCAGAACG |
| NEDD9      | GCTCCCAGGCTGGAGTACAGTGGCACAATCTCAGCTTACAGCAACCTCTGCCTCCCGGGTT<br>CAAGTGATTTTCTGCCTCAGCCTCCTGAGTAGTTGAGATTACAGGTGCACGCCACCATGC      |
| NFAT5      | TGGAAGCCATGAGAGAGAATATGATTTTCAGGAAAAGTGGGCACAGAGAATTTGGCCTATCTC<br>AGTATGACAACTAATAGCTGTTGTGATTCATTTAGGGACTGTTGTAAATATTTGATTA      |

**Supplementary Table S2: Gene expression of the top differentially expressed genes in the three classes**

| Probe        | Map          | Gene Symbol | LogFC.1 vs 2 | Adj. p-value<br>1 vs 2 | LogFC.2A vs<br>2B | Adj. p-value<br>2A vs 2B | LogFC.1 vs 2A | Adj. p-value<br>1 vs 2A |
|--------------|--------------|-------------|--------------|------------------------|-------------------|--------------------------|---------------|-------------------------|
| ILMN_1735764 | 2q36.3-q37.1 | HTR2B       | -3.773908392 | 3.32E-14               | -0.934860257      | 0.065334695              | -3.199143842  | 1.15E-10                |
| ILMN_1803945 | 6p21.3       | HCP5        | -2.66663481  | 2.95E-10               | -1.526639411      | 0.00433641               | -1.666679192  | 5.21E-05                |
| ILMN_1778401 | 6p21.3       | HLA-B       | -2.38907834  | 2.45E-08               | -2.081580926      | 0.000862178              | -1.03733205   | 0.018977868             |
| ILMN_1691641 | Xq13.1       | CITED1      | -2.287132646 | 5.18E-10               | -0.171011652      | 0.585474286              | -2.167603733  | 6.73E-07                |
| ILMN_2337655 | 14q32.31     | WARS        | -2.266810219 | 4.91E-09               | -1.805074178      | 0.000158268              | -1.194667337  | 0.000551673             |
| ILMN_1727271 | 14q32.31     | WARS        | -2.143112717 | 2.17E-08               | -1.780051251      | 0.000301266              | -1.064401571  | 0.00231439              |
| ILMN_1770940 | 16q22.1      | CDH1        | -2.076563054 | 2.36E-07               | 0.867038878       | 0.044872618              | -2.652152735  | 7.75E-08                |
| ILMN_2058782 | 14q32        | IFI27       | -2.036064217 | 0.000495533            | -2.952315446      | 0.000341596              | -0.053944659  | 0.964550758             |
| ILMN_1751079 | 6p21.3       | TAP1        | -1.999461061 | 3.00E-07               | -2.17396159       | 1.55E-05                 | -0.713550773  | 0.04172581              |
| ILMN_2329735 | 1q21         | ECM1        | -1.996423647 | 4.22E-09               | -0.862975474      | 0.097090624              | -1.432839125  | 7.84E-05                |
| ILMN_2352097 | 16q13        | GPR56       | -1.978357632 | 1.40E-08               | 0.06638202        | 0.880409419              | -2.089506775  | 5.00E-07                |
| ILMN_1720282 | 16q22.1      | NQO1        | -1.958702811 | 7.01E-12               | -0.312744968      | 0.456598454              | -1.744600311  | 3.40E-08                |
| ILMN_1724533 | 8q21.11      | LY96        | -1.943487835 | 5.42E-05               | -1.61796231       | 0.026150643              | -0.727712908  | 0.303492543             |
| ILMN_2384122 | 16q13        | GPR56       | -1.938534966 | 1.06E-08               | 0.080961406       | 0.84253637               | -2.057689005  | 3.03E-07                |
| ILMN_2188862 | 19p13.11     | GDF15       | -1.920898369 | 5.02E-06               | -0.689602297      | 0.218668928              | -1.386779452  | 0.009212452             |
| ILMN_1657111 | 14q32.33     | AHNAK2      | -1.904421005 | 2.83E-07               | 0.19839201        | 0.79063382               | -1.967675258  | 4.25E-05                |
| ILMN_1691364 | 2q32.2       | STAT1       | -1.901311636 | 3.87E-06               | -2.22685769       | 0.000156814              | -0.519941698  | 0.268249908             |
| ILMN_2186806 | 6p21.3       | HLA-A       | -1.856722458 | 1.24E-06               | -1.842512556      | 0.000548884              | -0.680184582  | 0.125312752             |

(Continued)

| Probe        | Map            | Gene Symbol | LogFC.1 vs 2 | Adj. p-value<br>1 vs 2 | LogFC.2A vs<br>2B | Adj. p-value<br>2A vs 2B | LogFC.1 vs 2A | Adj. p-value<br>1 vs 2A |
|--------------|----------------|-------------|--------------|------------------------|-------------------|--------------------------|---------------|-------------------------|
| ILMN_1758128 | 17q25          | CYGB        | -1.849044334 | 2.74E-08               | -0.134359598      | 0.839360217              | -1.877894072  | 2.25E-06                |
| ILMN_2130441 | 6p21.3         | HLA-H       | -1.837938204 | 2.68E-07               | -1.827910037      | 5.54E-05                 | -0.661482354  | 0.091379956             |
| ILMN_2049536 | 17p11.2        | TRPV2       | -1.726229181 | 3.32E-08               | -0.226198045      | 0.745153761              | -1.49996204   | 9.93E-05                |
| ILMN_2054019 | 1p36.33        | ISG15       | -1.710533103 | 1.79E-05               | -2.218751047      | 5.35E-05                 | -0.342756166  | 0.480783875             |
| ILMN_1784602 | 6p21.2         | CDKN1A      | -1.637679023 | 6.72E-08               | -0.382698788      | 0.549429049              | -1.305559946  | 0.001062968             |
| ILMN_3243156 | 14q32.33       | AHNAK2      | -1.631469761 | 4.57E-07               | 0.245578987       | 0.676536857              | -1.717288078  | 4.15E-05                |
| ILMN_1723978 | 22q13.1        | LGALS1      | -1.607783419 | 5.87E-11               | -0.597722926      | 0.040683991              | -1.13374455   | 0.000225399             |
| ILMN_1801246 | 11p15.5        | IFITM1      | -1.603895174 | 7.09E-05               | -2.172972454      | 5.54E-05                 | -0.2908723    | 0.609435438             |
| ILMN_1660691 | 18p11.3        | RAB31       | -1.582171721 | 2.07E-11               | -0.163211795      | 0.677888809              | -1.401483179  | 5.75E-07                |
| ILMN_2108735 | 20q13.3        | EEF1A2      | -1.581954568 | 0.003061057            | -1.256779356      | 0.143336167              | -0.812554953  | 0.294247268             |
| ILMN_1676563 | 10q26.3        | HTRA1       | -1.571761855 | 1.06E-08               | -0.281216032      | 0.578241003              | -1.25839444   | 0.00029402              |
| ILMN_1666078 | 6p21.3         | HLA-H       | -1.56693276  | 0.000220765            | -1.492089818      | 0.011779147              | -0.804267994  | 0.118692468             |
| ILMN_1694268 | 2q37.3         | HES6        | -1.551730975 | 3.51E-10               | 0.010207587       | 0.987060183              | -1.389314129  | 1.94E-05                |
| ILMN_2379644 | 5q32           | CD74        | -1.522558292 | 0.000208917            | -1.456207652      | 0.05047505               | -0.575269248  | 0.352677712             |
| ILMN_1704154 | 13q12.11-q12.3 | TNFRSF19    | -1.50147218  | 1.67E-07               | -0.17432277       | 0.810775999              | -1.3172177    | 0.000305706             |
| ILMN_2060086 | 2q33           | ADAM23      | -1.494049148 | 1.24E-05               | 0.892425379       | 0.099186067              | -2.080566429  | 1.36E-06                |
| ILMN_2366330 | 11q13.1        | FERMT3      | -1.482467027 | 1.63E-08               | -0.155069949      | 0.726916522              | -1.323238034  | 4.78E-05                |
| ILMN_1725427 | 15q21-q22.2    | B2M         | -1.481512737 | 3.54E-07               | -1.27677156       | 0.002141                 | -0.667950409  | 0.035732787             |
| ILMN_1679208 | 7q22.1         | LHFPL3-AS1  | -1.477219872 | 4.57E-07               | -0.498307113      | 0.329942711              | -1.000683167  | 0.005230774             |
| ILMN_1736567 | 5q32           | CD74        | -1.475482233 | 0.000347899            | -1.451771578      | 0.054889055              | -0.528228843  | 0.412408716             |
| ILMN_2148459 | 15q21-q22.2    | B2M         | -1.474818568 | 1.09E-08               | -1.128232399      | 0.000518798              | -0.733307622  | 0.005499572             |
| ILMN_2390299 | 6p21.3         | PSMB8       | -1.462913166 | 3.24E-07               | -1.489399362      | 5.54E-05                 | -0.464486376  | 0.127891696             |
| ILMN_1653494 | 1q21           | S100A1      | -1.456593391 | 0.000100276            | 0.108023535       | 0.895535539              | -1.615577519  | 0.000696915             |
| ILMN_1793476 | 11p15.4        | PRKCDBP     | -1.419121924 | 5.40E-07               | -0.412504148      | 0.449002125              | -1.026111852  | 0.00681702              |
| ILMN_1747195 | 6p21.3         | PSMB8       | -1.406736629 | 2.33E-07               | -1.361023129      | 0.000142967              | -0.484940728  | 0.090678383             |
| ILMN_1796409 | 1p36.12        | C1QB        | -1.40534744  | 0.000681717            | -1.495300525      | 0.026994241              | -0.448802397  | 0.484071008             |
| ILMN_1659913 | 15q26          | ISG20       | -1.403091805 | 3.91E-05               | -1.549345257      | 0.00060989               | -0.306617422  | 0.478974807             |
| ILMN_1725193 | 2q33-q34       | IGFBP2      | -1.399708363 | 3.09E-08               | -0.12908906       | 0.843863729              | -1.162161451  | 0.000466155             |
| ILMN_1782050 | 8p11.2-p11.1   | CEBPD       | -1.395006423 | 4.39E-07               | -0.043338611      | 0.952858182              | -1.334197316  | 0.000210616             |
| ILMN_2157441 | 6p21.3         | HLA-DRA     | -1.393274828 | 0.001410494            | -1.738923346      | 0.014976541              | -0.282501616  | 0.717775178             |
| ILMN_1769779 | 8q24.3         | PTP4A3      | -1.39004584  | 1.31E-07               | -0.484935905      | 0.252641849              | -1.100111001  | 0.000280978             |
| ILMN_1762861 | 6p21.3         | HLA-F       | -1.351637038 | 1.98E-05               | -1.385331383      | 0.003045645              | -0.350139811  | 0.41508905              |
| ILMN_1708375 | 5q31.1         | IRF1        | -1.343649903 | 3.26E-05               | -1.432841362      | 0.001588993              | -0.381627053  | 0.34522034              |
| ILMN_1810844 | 7q36.1         | RARRES2     | -1.335158883 | 0.000222874            | -0.062936549      | 0.944543429              | -1.165391772  | 0.022203596             |
| ILMN_1765258 | 6p21.3         | HLA-E       | -1.311146182 | 7.66E-06               | -1.611888624      | 0.000158268              | -0.315797125  | 0.409305273             |
| ILMN_1772218 | 6p21.3         | HLA-DPA1    | -1.310768829 | 0.002836507            | -1.453661429      | 0.061661454              | -0.357607473  | 0.640730802             |
| ILMN_1729691 | 17q24.2        | SLC16A6     | -1.299771314 | 3.62E-06               | -0.090602799      | 0.913423939              | -1.231147812  | 0.000626107             |
| ILMN_1713636 | 1q21           | S100A6      | -1.294152227 | 2.53E-07               | -0.638913429      | 0.120437702              | -0.895606445  | 0.00325878              |
| ILMN_1702487 | 6q23           | SGK1        | -1.291490458 | 0.001490199            | -0.294082571      | 0.718613535              | -0.928152744  | 0.129251968             |
| ILMN_2109708 | 22q13.33       | TYMP        | -1.2878876   | 2.21E-05               | -1.512205093      | 0.000283042              | -0.327015501  | 0.446610528             |

(Continued)

| Probe        | Map         | Gene Symbol | LogFC.1 vs 2 | Adj. p-value<br>1 vs 2 | LogFC.2A vs<br>2B | Adj. p-value<br>2A vs 2B | LogFC.1 vs 2A | Adj. p-value<br>1 vs 2A |
|--------------|-------------|-------------|--------------|------------------------|-------------------|--------------------------|---------------|-------------------------|
| ILMN_1795930 | 5p13.1      | PTGER4      | -1.286717865 | 0.000970005            | -0.76748395       | 0.18230754               | -0.606010589  | 0.336703663             |
| ILMN_2098126 | 17q11.2-q12 | CCL5        | -1.284655576 | 0.002322207            | -1.86024864       | 0.008616187              | -0.060827329  | 0.948879493             |
| ILMN_2358069 | 7p22        | MAD1L1      | -1.274162082 | 1.04E-08               | 0.081873277       | 0.89705128               | -1.250656388  | 1.11E-05                |
| ILMN_2359710 | 8q24.3      | PTP4A3      | -1.273250293 | 2.03E-07               | -0.419965606      | 0.335068999              | -1.002959441  | 0.000564678             |
| ILMN_1696187 | 14q21-q22   | PYGL        | -1.254681852 | 0.001771987            | 0.453479289       | 0.60410177               | -1.648594315  | 0.001355887             |
| ILMN_1730084 | 22q11.21    | COMT        | -1.253157567 | 5.73E-12               | 0.298837526       | 0.245428188              | -1.398281728  | 4.04E-10                |
| ILMN_1806733 | 21q22.3     | COL18A1     | -1.248432723 | 4.63E-09               | -0.13563169       | 0.807207586              | -1.09196204   | 4.15E-05                |
| ILMN_1785902 | 1p36.11     | C1QC        | -1.242953802 | 0.000337762            | -1.292361987      | 0.017742391              | -0.423036425  | 0.392003425             |
| ILMN_1761733 | 6p21.3      | HLA-DMB     | -1.23681126  | 0.001074151            | -1.409926005      | 0.016646807              | -0.208680975  | 0.783227001             |
| ILMN_1739241 | 15q15.1     | CHAC1       | -1.233630321 | 4.86E-11               | -0.097759854      | 0.807164842              | -1.153413343  | 4.53E-07                |
| ILMN_1757387 | 4p14        | UCHL1       | -1.223234587 | 0.000958245            | -0.627741177      | 0.217766395              | -0.485457064  | 0.453521545             |
| ILMN_1669523 | 14q24.3     | FOS         | -1.22144887  | 0.000151106            | -0.264449692      | 0.721002588              | -1.057807158  | 0.012502918             |
| ILMN_1682928 | 7p15.1      | CPVL        | -1.213052895 | 2.24E-08               | -0.199378838      | 0.415111615              | -1.158055933  | 2.09E-06                |
| ILMN_2062468 | 4q12        | IGFBP7      | -1.212651879 | 3.52E-05               | 0.217779953       | 0.677086483              | -1.451266092  | 7.88E-05                |
| ILMN_1786041 | Xp22.2      | ASB9        | -1.209130965 | 5.63E-08               | 0.282118814       | 0.488074948              | -1.441938823  | 1.10E-07                |
| ILMN_1779171 | 17p13.3     | SGSM2       | -1.20596083  | 5.37E-07               | 0.432776886       | 0.122474351              | -1.583182598  | 5.85E-08                |
| ILMN_1662427 | 8q24.3      | PTP4A3      | -1.205823574 | 3.09E-07               | -0.415432091      | 0.296312507              | -0.941502922  | 0.000743735             |
| ILMN_1671054 | 6p21.3      | HLA-A       | -1.205252456 | 4.13E-07               | -1.033963813      | 0.001992219              | -0.434241785  | 0.150599387             |
| ILMN_1662358 | 21q22.3     | MX1         | -1.203899161 | 0.000440498            | -1.673818424      | 0.002630017              | -0.189552499  | 0.769106644             |
| ILMN_1687384 | 1p35        | IFI6        | -1.198258771 | 0.000442643            | -1.847146326      | 0.000301266              | -0.04565734   | 0.953193267             |
| ILMN_1663866 | 5q31        | TGFBI       | -1.189847867 | 3.17E-06               | -0.508328367      | 0.290550661              | -0.869434873  | 0.005514915             |
| ILMN_1656194 | 17q25.3     | TSPAN10     | -1.188484584 | 4.56E-06               | 0.150583817       | 0.773596208              | -1.310845191  | 0.000128899             |
| ILMN_1777325 | 2q32.2      | STAT1       | -1.18802805  | 0.000202326            | -1.895540123      | 5.54E-05                 | 0.003009297   | 0.996141387             |
| ILMN_1676099 | 4p16.3      | SPON2       | -1.177578697 | 3.55E-09               | -0.177833628      | 0.686698836              | -0.933368764  | 0.00034736              |
| ILMN_2229379 | 4q11-q12    | KIT         | -1.176612669 | 0.000936995            | 0.735803564       | 0.176446393              | -1.815791705  | 0.000101932             |
| ILMN_1789733 | 19q13.12    | CLIP3       | -1.171904708 | 1.50E-06               | 0.161867421       | 0.730052968              | -1.159783617  | 0.000639028             |
| ILMN_1689655 | 6p21.3      | HLA-DRA     | -1.167043216 | 0.007892476            | -1.613776991      | 0.027715304              | -0.135281356  | 0.878552409             |
| ILMN_1710740 | 6p21.3      | C2          | -1.164851011 | 6.17E-10               | -0.424882045      | 0.098916056              | -0.871550238  | 2.21E-05                |
| ILMN_1801766 | 4q25        | CCDC109B    | -1.163072045 | 6.52E-08               | -0.504777282      | 0.109892945              | -0.701162306  | 0.00977496              |
| ILMN_1790160 | 4q11-q12    | KIT         | -1.161790871 | 0.002217089            | 0.963724842       | 0.104580216              | -1.901990254  | 0.000231025             |
| ILMN_1656670 | 6p21.3      | HLA-G       | -1.155427467 | 7.79E-06               | -1.153720079      | 0.000555697              | -0.403899161  | 0.196509477             |
| ILMN_2366212 | 17q23       | CD79B       | -1.152695659 | 3.99E-05               | -0.252558905      | 0.636624936              | -1.083677951  | 0.002516523             |
| ILMN_2400759 | 7p15.1      | CPVL        | -1.152219072 | 1.24E-07               | -0.219539557      | 0.405082416              | -1.107281891  | 1.03E-05                |
| ILMN_1805750 | 11p15.5     | IFITM3      | -1.146116484 | 3.97E-08               | -0.665509972      | 0.015898115              | -0.727714558  | 0.002113514             |
| ILMN_1688780 | 1q21        | S100A4      | -1.145891451 | 0.000928153            | -0.8091866        | 0.132261453              | -0.569235362  | 0.264284082             |
| ILMN_2203950 | 6p21.3      | HLA-A       | -1.145672159 | 3.38E-09               | -0.779088685      | 0.000856288              | -0.641404042  | 0.002494604             |
| ILMN_1690105 | 2q32.2      | STAT1       | -1.143448518 | 0.000309827            | -1.36174288       | 0.002120612              | -0.180381399  | 0.709423443             |
| ILMN_1771800 | 17q22-q23.2 | PRKCA       | -1.124829082 | 4.51E-05               | -0.3701347        | 0.503222467              | -0.903227909  | 0.011468085             |
| ILMN_2067656 | 12p13       | CCND2       | -1.120127725 | 0.004083695            | 0.475659118       | 0.420139451              | -1.418441381  | 0.006122274             |
| ILMN_1774077 | 1p22.2      | GBP2        | -1.117392306 | 0.004043561            | -1.715583799      | 0.00433641               | 0.004970278   | 0.995396575             |

(Continued)

| Probe        | Map           | Gene Symbol | LogFC.1 vs 2 | Adj. p-value<br>1 vs 2 | LogFC.2A vs<br>2B | Adj. p-value<br>2A vs 2B | LogFC.1 vs 2A | Adj. p-value<br>1 vs 2A |
|--------------|---------------|-------------|--------------|------------------------|-------------------|--------------------------|---------------|-------------------------|
| ILMN_1815115 | 8q24.3        | CYC1        | -1.111580082 | 4.63E-08               | -0.554010798      | 0.108902369              | -0.76621322   | 0.000989067             |
| ILMN_1722820 | 22q13.1       | KDELR3      | -1.110198917 | 4.14E-08               | -0.370423955      | 0.18281206               | -0.905728416  | 5.90E-05                |
| ILMN_1808405 | 6p21.3        | HLA-DQA1    | -1.107343321 | 0.015565072            | -1.444103747      | 0.054603468              | -0.095545379  | 0.922552961             |
| ILMN_1802027 | 4q28.3        | MGST2       | -1.101678462 | 1.06E-08               | -0.361167552      | 0.12459274               | -0.929274922  | 1.07E-05                |
| ILMN_1695311 | 6p21.3        | HLA-DMA     | -1.094127489 | 0.000890934            | -1.352001983      | 0.009311445              | -0.225074599  | 0.709598127             |
| ILMN_1743103 | 10q24.33      | SH3PXD2A    | -1.08906427  | 3.38E-06               | 0.607414723       | 0.137438736              | -1.400508743  | 3.78E-06                |
| ILMN_2334296 | 11q13         | IL18BP      | -1.082418546 | 0.00016257             | -1.191449854      | 0.002971623              | -0.201727242  | 0.679569868             |
| ILMN_2066066 | 6p21.3        | HLA-DRB6    | -1.081050989 | 0.004337548            | -1.420112933      | 0.019127522              | -0.106183998  | 0.892864946             |
| ILMN_1708778 | 9q34.1        | ASS1        | -1.07728373  | 2.91E-05               | -0.364980639      | 0.368764337              | -0.637488249  | 0.095475721             |
| ILMN_1803788 | 14q22.3       | LGALS3      | -1.070982922 | 1.04E-05               | -0.822964131      | 0.011779147              | -0.480980901  | 0.155314416             |
| ILMN_1673352 | 11p15.5       | IFITM2      | -1.070116856 | 1.12E-08               | -0.698340489      | 0.004154219              | -0.653207814  | 0.00146188              |
| ILMN_3245057 | 8q24.1-q24.2  | ASAP1       | -1.068044193 | 5.13E-07               | 0.251282236       | 0.565761753              | -1.172244835  | 2.41E-05                |
| ILMN_3305938 | 6q23          | SGK1        | -1.064550475 | 0.007636294            | -0.290727373      | 0.710479608              | -0.690151371  | 0.274836645             |
| ILMN_1805737 | 10p15.3-p15.2 | PFKP        | -1.064253058 | 1.13E-07               | -0.281986458      | 0.227127929              | -0.842631468  | 0.00049186              |
| ILMN_1684306 | 1q21          | S100A4      | -1.055266309 | 0.001034069            | -0.769577479      | 0.103832364              | -0.507951039  | 0.285227807             |
| ILMN_1686664 | 16q13         | MT2A        | -1.050536453 | 0.00018572             | -0.813068892      | 0.060627835              | -0.496255256  | 0.207895987             |
| ILMN_1745034 | 12q13         | SLC11A2     | -1.045247158 | 3.87E-08               | -0.100349454      | 0.822909956              | -0.953501469  | 8.71E-05                |
| ILMN_1787345 | 12q13.12      | FKBP11      | -1.044617402 | 0.000305274            | -0.615553014      | 0.254352932              | -0.691177225  | 0.094597515             |
| ILMN_1701613 | 11q23         | RARRES3     | -1.04129153  | 0.028213669            | -2.117220714      | 0.001197527              | 0.359788873   | 0.590200319             |
| ILMN_1771652 | 22q13.1       | BAIAP2L2    | -1.037245324 | 9.58E-07               | 0.08336743        | 0.83299303               | -1.186731927  | 3.83E-06                |
| ILMN_1743836 | 17q25.1       | MXRA7       | -1.035744309 | 9.22E-11               | 0.122853077       | 0.718989023              | -1.066988757  | 6.25E-08                |
| ILMN_1656920 | 14q32.33      | CRIP1       | -1.035138968 | 6.35E-07               | -0.571091783      | 0.091294504              | -0.610058978  | 0.018735274             |
| ILMN_1766657 | 9q34.1        | STOM        | -1.032720922 | 8.73E-07               | -0.686220443      | 0.03717254               | -0.5476821    | 0.043531095             |
| ILMN_1778977 | 19q13.1       | TYROBP      | -1.026783881 | 0.004074888            | -1.285362278      | 0.012378171              | -0.056575673  | 0.945469006             |
| ILMN_3229324 | 6q23          | SGK1        | -1.017792894 | 0.015168731            | -0.271510437      | 0.748202438              | -0.63921103   | 0.349488079             |
| ILMN_2218208 | 4q22.1        | SPARCL1     | -1.016969117 | 0.026934898            | 0.840276126       | 0.405034431              | -1.532358514  | 0.010204208             |
| ILMN_1744118 | 9q33.1        | ASTN2       | -1.013255179 | 1.37E-05               | -0.038780848      | 0.957168549              | -0.983087258  | 0.001245753             |
| ILMN_1736982 | 6p24.1        | PHACTR1     | -1.010594848 | 0.047662066            | -0.495126318      | 0.535259965              | -0.58128186   | 0.494308796             |
| ILMN_1676893 | 2p23.3        | ADCY3       | -1.010294916 | 2.34E-08               | -0.196587678      | 0.521295588              | -0.7775104    | 0.001426401             |
| ILMN_1725791 | 10p14-p13     | PTPLA       | -1.010177268 | 8.73E-07               | -0.19282835       | 0.678530722              | -0.874405961  | 0.000700149             |
| ILMN_1773352 | 17q11.2-q12   | CCL5        | -1.010089785 | 0.002187047            | -1.247163489      | 0.022681411              | -0.082984494  | 0.903532691             |
| ILMN_2376108 | 6p21.3        | PSMB9       | -1.00615672  | 0.000970071            | -1.245073429      | 0.003045645              | -0.001525824  | 0.998188548             |
| ILMN_1723480 | 19p13.1       | BST2        | -1.00536494  | 0.002547297            | -1.616081005      | 0.000486479              | 0.067795293   | 0.912632742             |
| ILMN_1732923 | 1q42.2        | SIPA1L2     | -1.001007275 | 7.61E-09               | 0.248899188       | 0.354864633              | -1.221156841  | 1.98E-08                |
| ILMN_2227817 | 6p12.1        | GSTA3       | 1.000389382  | 0.007978159            | 0.32219132        | 0.283738698              | 0.885142665   | 0.091525165             |
| ILMN_3210171 | 1q32.3        | RPL21P28    | 1.009169659  | 2.01E-05               | -0.043780051      | 0.956450371              | 0.925899886   | 0.005180224             |
| ILMN_2230025 | 4q35          | PDLIM3      | 1.012908713  | 0.000827357            | 0.118682307       | 0.832217916              | 0.969901392   | 0.032247858             |
| ILMN_1729033 | 4p13          | RPL9        | 1.01384583   | 3.88E-08               | 0.106650368       | 0.836323157              | 0.912498289   | 0.000670585             |
| ILMN_3225591 | 3p22-p21.2    | RPL14       | 1.020358629  | 1.14E-12               | 0.254346968       | 0.199791869              | 0.84168109    | 3.68E-08                |
| ILMN_1691611 | 19p13.2       | HNRNPA1P10  | 1.025336757  | 2.74E-08               | 0.409599232       | 0.209889412              | 0.647860311   | 0.011950508             |

(Continued)

| Probe        | Map          | Gene Symbol      | LogFC.1 vs 2 | Adj. p-value<br>1 vs 2 | LogFC.2A vs<br>2B | Adj. p-value<br>2A vs 2B | LogFC.1 vs 2A | Adj. p-value<br>1 vs 2A |
|--------------|--------------|------------------|--------------|------------------------|-------------------|--------------------------|---------------|-------------------------|
| ILMN_3304898 | 6p21.33      | TUBB             | 1.025842056  | 5.31E-08               | 0.256964706       | 0.344464336              | 0.797557368   | 0.00151551              |
| ILMN_1699562 | 8q11.21      | EFCAB1           | 1.026617421  | 0.000220765            | 0.063224105       | 0.480255267              | 1.020701496   | 0.004029976             |
| ILMN_1774823 | 4q25         | RPL34            | 1.03941488   | 1.56E-08               | 0.093231041       | 0.789770273              | 0.964168005   | 0.000221881             |
| ILMN_3278506 | 7p15.3       | RPS2P32          | 1.040920931  | 1.21E-06               | 0.177597564       | 0.747809982              | 0.894309529   | 0.004914792             |
| ILMN_2325506 | 20q13.13     | BCAS4            | 1.043939436  | 1.82E-05               | -0.183413303      | 0.608029491              | 1.273257967   | 2.78E-05                |
| ILMN_1740927 | 6p25.1       | LYRM4            | 1.046906568  | 2.07E-11               | 0.242269164       | 0.109745518              | 0.88699802    | 1.47E-07                |
| ILMN_2389273 | 3q28         | FXR1             | 1.047553084  | 1.04E-10               | 0.215593781       | 0.102435441              | 0.88530183    | 3.31E-06                |
| ILMN_1766165 | 4q21         | SNCA             | 1.051796428  | 5.47E-06               | 0.28018814        | 0.302800751              | 0.864838221   | 0.003237044             |
| ILMN_1654609 | 5q22.2       | EPB41L4A-<br>AS1 | 1.054896923  | 1.60E-08               | 0.538245025       | 0.083463239              | 0.649568228   | 0.008895082             |
| ILMN_1797154 | 7q22.1       | AZGP1            | 1.057343839  | 2.84E-08               | 0.178031986       | 0.120437702              | 0.907332771   | 4.34E-05                |
| ILMN_1808059 | 20q13.13     | BCAS4            | 1.058574197  | 5.55E-06               | -0.137182546      | 0.68512161               | 1.263332358   | 1.05E-05                |
| ILMN_1741096 | 8p23.1-p22   | FDFT1            | 1.066405633  | 8.09E-07               | 0.525631817       | 0.170094483              | 0.68629575    | 0.012896564             |
| ILMN_3293685 | 16p13.3      | RPS2             | 1.072483613  | 4.54E-06               | 0.093858595       | 0.905768961              | 0.923115148   | 0.005843499             |
| ILMN_1679093 | 19q13.42     | ZNF581           | 1.072600242  | 1.67E-10               | 0.197124122       | 0.335375027              | 0.888933663   | 2.15E-05                |
| ILMN_1665824 | 6p24.3       | LINC00518        | 1.074925305  | 4.20E-08               | 0.149632708       | 0.366535017              | 0.771126237   | 0.005119079             |
| ILMN_3302177 | 3p22-p21.2   | RPL14            | 1.077184959  | 3.36E-11               | 0.241119376       | 0.368764337              | 0.930657812   | 8.95E-07                |
| ILMN_1680344 | 18p11.31     | MYOM1            | 1.078054364  | 0.000271898            | -0.087273802      | 0.664111921              | 1.201942327   | 0.001839539             |
| ILMN_1808041 | 6p21.31      | RPL10A           | 1.082382125  | 3.29E-06               | 0.195958938       | 0.747678818              | 0.89521463    | 0.004843674             |
| ILMN_1654946 | 19q13.43     | ZSCAN18          | 1.082955746  | 4.22E-09               | 0.279033998       | 0.385037485              | 0.884732152   | 4.91E-05                |
| ILMN_2144088 | 8p23.1-p22   | FDFT1            | 1.086032559  | 2.37E-06               | 0.608412996       | 0.149593528              | 0.704375182   | 0.01383804              |
| ILMN_1664292 | 19q13.42     | ZNF415           | 1.088629313  | 2.40E-14               | -0.060568205      | 0.450118757              | 1.173901165   | 1.41E-14                |
| ILMN_2351638 | Xq22.1-q22.3 | BEX4             | 1.08871681   | 3.42E-10               | 0.266483391       | 0.258920998              | 0.870348102   | 2.78E-05                |
| ILMN_2138765 | 9p22.1       | PLIN2            | 1.0950394    | 3.00E-08               | -0.341854853      | 0.24190242               | 1.366876809   | 1.98E-08                |
| ILMN_1679640 | 3q28         | FXR1             | 1.0988054    | 2.31E-12               | 0.266476463       | 0.080969607              | 0.944250501   | 3.48E-09                |
| ILMN_1810533 | 12q21.3      | SLC6A15          | 1.100594841  | 1.90E-08               | 0.335476464       | 0.213403899              | 0.826079503   | 0.000784998             |
| ILMN_1766446 | 6p21.3       | C6orf48          | 1.100937012  | 3.25E-09               | 0.226332046       | 0.340211668              | 0.927314751   | 2.67E-05                |
| ILMN_1660439 | 22q13        | RPL3             | 1.106517102  | 1.76E-07               | 0.40250656        | 0.263954692              | 0.763851676   | 0.006599111             |
| ILMN_3244583 | 5q22.2       | EPB41L4A-<br>AS1 | 1.108311628  | 6.78E-09               | 0.545709662       | 0.055987692              | 0.692940462   | 0.004698967             |
| ILMN_1694106 | 3p22.3       | GPD1L            | 1.110684568  | 1.10E-09               | 0.392620984       | 0.047867867              | 0.823978019   | 4.25E-05                |
| ILMN_3225784 | 9q21.13      | RPSAP9           | 1.114453354  | 4.02E-10               | 0.209152773       | 0.435478729              | 1.028823175   | 1.61E-07                |
| ILMN_2404850 | 3p22-p21.2   | RPL14            | 1.128421289  | 0.000912076            | 0.477220804       | 0.382725969              | 0.648983261   | 0.207973525             |
| ILMN_3241051 | 3p25-p24     | RPL32            | 1.144777125  | 1.68E-11               | 0.377499734       | 0.081451755              | 0.896340608   | 6.54E-07                |
| ILMN_1762747 | 3p24.2       | RPL15            | 1.147236254  | 6.16E-11               | 0.485573398       | 0.035493668              | 0.834717513   | 1.32E-05                |
| ILMN_1717381 | 2q31.1       | HOXD1            | 1.149018854  | 0.001869334            | -0.016326993      | 0.979370587              | 1.257530218   | 0.010351204             |
| ILMN_1742330 | 3p21.31      | PLXNB1           | 1.151634332  | 4.77E-09               | 0.307456076       | 0.156975198              | 0.986064207   | 3.14E-06                |
| ILMN_1765574 | 6p24         | TFAP2A           | 1.155987834  | 3.47E-06               | 0.894639838       | 0.00485557               | 0.64083042    | 0.021720434             |
| ILMN_1808837 | 9q34         | RPL7A            | 1.157624855  | 4.61E-09               | 0.387443005       | 0.109745518              | 0.794960725   | 0.002820649             |
| ILMN_3243291 | 12q13.1      | HNRNPA1          | 1.168422696  | 5.16E-08               | 0.379313703       | 0.339819137              | 0.794206907   | 0.00808425              |
| ILMN_3294222 | 7p15.3       | RPS2P32          | 1.184870421  | 8.70E-06               | 0.512576125       | 0.231290236              | 0.670509356   | 0.09278963              |

(Continued)

| Probe        | Map           | Gene Symbol  | LogFC.1 vs 2 | Adj. p-value<br>1 vs 2 | LogFC.2A vs<br>2B | Adj. p-value<br>2A vs 2B | LogFC.1 vs 2A | Adj. p-value<br>1 vs 2A |
|--------------|---------------|--------------|--------------|------------------------|-------------------|--------------------------|---------------|-------------------------|
| ILMN_3274596 | 3q28          | EIF4A2       | 1.185844732  | 1.68E-08               | 0.081121203       | 0.881125075              | 1.117905095   | 2.20E-05                |
| ILMN_2181892 | Xq22          | BEX2         | 1.18895458   | 3.01E-07               | -0.000435374      | 0.998680003              | 1.163167865   | 8.68E-05                |
| ILMN_1758049 | 1p31.3-p31.2  | NFIA         | 1.196694805  | 5.29E-11               | 0.129687319       | 0.120214425              | 1.088415295   | 2.55E-08                |
| ILMN_1793990 | 2p25          | ID2          | 1.204169896  | 3.69E-07               | 0.119990511       | 0.723833155              | 1.235304813   | 4.16E-06                |
| ILMN_1672503 | 8p22-p21      | DPYSL2       | 1.204618695  | 5.30E-06               | 0.308264815       | 0.574172971              | 1.094493565   | 0.000820227             |
| ILMN_3243616 | 20q13.33      | LOC100127888 | 1.216677914  | 5.32E-06               | 0.665181424       | 0.054251792              | 0.715201734   | 0.061915381             |
| ILMN_3309349 | 4q26          | SNHG8        | 1.217538898  | 0.000687661            | 0.283230754       | 0.711384187              | 0.981324303   | 0.048967414             |
| ILMN_1775743 | 12q22         | BTG1         | 1.227172139  | 2.34E-07               | 0.27512776        | 0.542971946              | 1.06785611    | 0.000259036             |
| ILMN_1732154 | 1q31          | BCAN         | 1.234925957  | 0.000329621            | 0.092682046       | 0.859477273              | 1.23256803    | 0.005531251             |
| ILMN_2146389 | 5q33          | MEGF10       | 1.244835792  | 1.36E-10               | 0.018019419       | 0.80518906               | 1.199536868   | 2.11E-07                |
| ILMN_1713529 | 5q23.1        | SEMA6A       | 1.245867424  | 5.97E-06               | 1.073177232       | 0.001992219              | 0.593865104   | 0.056583351             |
| ILMN_1690342 | 12q22         | LTA4H        | 1.247267616  | 2.31E-12               | 0.279998099       | 0.14712732               | 1.09837339    | 1.85E-09                |
| ILMN_1684982 | 7q21.3        | PDK4         | 1.272845665  | 1.11E-05               | 0.096661757       | 0.689596535              | 1.098202322   | 0.006094742             |
| ILMN_1655422 | 18q21         | RPL17        | 1.278107874  | 5.41E-08               | -0.07032434       | 0.910619571              | 1.349116661   | 1.47E-05                |
| ILMN_1685917 | 4q24          | EMCN         | 1.278180642  | 1.09E-07               | 0.056026727       | 0.915318731              | 1.212684394   | 0.000370253             |
| ILMN_1751904 | 13q22         | EDNRB        | 1.280184833  | 0.000167768            | 0.960543451       | 0.048334041              | 0.739750872   | 0.09122889              |
| ILMN_1740234 | 10q25.1       | GSTO2        | 1.289190898  | 1.75E-05               | 0.093163282       | 0.796473023              | 1.151420901   | 0.003569825             |
| ILMN_1658498 | 1p21.3        | SLC44A3      | 1.291554929  | 6.26E-09               | 0.461201737       | 0.037553517              | 0.813982711   | 0.003691123             |
| ILMN_1716014 | 3p24.2        | RPL15        | 1.294050275  | 8.81E-09               | 0.135250391       | 0.780674971              | 1.208660273   | 1.11E-05                |
| ILMN_3287068 | 9q21.13       | RPSAP9       | 1.30214539   | 1.73E-10               | 0.188443385       | 0.505045669              | 1.218323469   | 1.07E-07                |
| ILMN_1692058 | 15q11.2-q12   | NDN          | 1.30284313   | 2.29E-06               | 0.032000201       | 0.974399337              | 1.299779461   | 0.0002229               |
| ILMN_1790881 | 2q22.1        | HNMT         | 1.305607283  | 1.12E-08               | 0.243631764       | 0.457196304              | 1.187279893   | 6.88E-06                |
| ILMN_1754969 | 3p26-p24      | LMCD1        | 1.313718501  | 4.86E-11               | 0.016442545       | 0.910393484              | 1.346172489   | 1.85E-09                |
| ILMN_1733305 | 3q25.1        | EIF2A        | 1.315492384  | 3.32E-14               | 0.313502771       | 0.03359472               | 1.070634923   | 6.06E-08                |
| ILMN_1785424 | 10q25         | ABLIM1       | 1.319568054  | 1.30E-05               | 0.372574362       | 0.166192781              | 1.14573872    | 0.002051582             |
| ILMN_1671554 | 2p25.1        | LPIN1        | 1.320195822  | 4.10E-10               | 0.360134813       | 0.129333387              | 1.065648353   | 6.28E-06                |
| ILMN_1691053 | 16p13.3       | RPS2         | 1.337410651  | 6.42E-09               | 0.245972769       | 0.453571352              | 1.092622198   | 0.000327466             |
| ILMN_1772627 | 4p16.3        | NSG1         | 1.339033154  | 4.83E-08               | 0.41835911        | 0.179117132              | 1.140256143   | 0.000119501             |
| ILMN_1682459 | 19p13.3       | TUBB4A       | 1.351559415  | 3.03E-07               | 0.738871781       | 0.006675471              | 0.965868934   | 0.000481317             |
| ILMN_3227023 | 9q34.3        | SNHG7        | 1.365658127  | 2.11E-08               | 0.806325225       | 0.056357312              | 0.858783102   | 0.003469886             |
| ILMN_1679324 | 3p22.1        | EIF1B        | 1.399790804  | 7.99E-11               | -0.095756672      | 0.831345998              | 1.444967125   | 2.93E-08                |
| ILMN_1712786 | 7q32.1        | AHCYL2       | 1.406766726  | 7.62E-07               | 0.35055169        | 0.490113011              | 1.162861731   | 0.00092869              |
| ILMN_1736670 | 10q23-q24     | PPP1R3C      | 1.41282522   | 1.45E-05               | 0.96377997        | 0.002052965              | 0.79295205    | 0.051301141             |
| ILMN_3289100 | 3p21.3-p21.2  | RPL29        | 1.424227229  | 5.53E-10               | 0.407122491       | 0.223840114              | 1.151857458   | 1.92E-05                |
| ILMN_2374115 | 6p24          | TFAP2A       | 1.427376215  | 4.22E-09               | 0.628374495       | 0.005203369              | 0.993976042   | 0.000183433             |
| ILMN_2218935 | 7q31          | GPR37        | 1.454469504  | 2.02E-05               | 0.872541243       | 0.035064285              | 0.739604938   | 0.124983922             |
| ILMN_3233229 | 9q34.3        | SNHG7        | 1.461632818  | 4.77E-08               | 0.759171839       | 0.078824777              | 0.92004441    | 0.006157917             |
| ILMN_1807050 | 15q21.1-q21.2 | SHC4         | 1.463334644  | 8.75E-09               | 0.020460022       | 0.925436808              | 1.488818569   | 8.90E-07                |
| ILMN_1687978 | 12q15         | PHLDA1       | 1.507837374  | 3.37E-09               | 0.511392248       | 0.067518294              | 1.309639231   | 5.43E-07                |
| ILMN_2176592 | 3q26.1-q26.2  | BCHE         | 1.510293282  | 4.95E-11               | 0.134085017       | 0.602893484              | 1.261652892   | 1.37E-05                |

(Continued)



| Probe        | Map          | Gene Symbol  | LogFC.1 vs 2 | Adj. <i>p</i> -value<br>1 vs 2 | LogFC.2A vs<br>2B | Adj. <i>p</i> -value<br>2A vs 2B | LogFC.1 vs 2A | Adj. <i>p</i> -value<br>1 vs 2A |
|--------------|--------------|--------------|--------------|--------------------------------|-------------------|----------------------------------|---------------|---------------------------------|
| ILMN_3226291 | 3p21.3-p21.2 | RPL29        | 1.518659314  | 1.91E-10                       | 0.481222714       | 0.132924077                      | 1.184637718   | 1.32E-05                        |
| ILMN_1751346 | 12q13        | ERBB3        | 1.533761351  | 3.27E-08                       | 0.825608838       | 0.025235833                      | 0.909270118   | 0.005950394                     |
| ILMN_1701933 | 4q21         | SNCA         | 1.540994797  | 4.27E-06                       | 0.511236896       | 0.354547349                      | 1.266961361   | 0.00231439                      |
| ILMN_1659550 | 12q14.3      | RPSAP52      | 1.626872445  | 2.02E-07                       | 0.077636637       | 0.933596867                      | 1.580409429   | 6.17E-05                        |
| ILMN_3219764 | 3p22.2       | RPSA         | 1.632917134  | 4.86E-11                       | 0.316400233       | 0.404253808                      | 1.482346609   | 1.34E-07                        |
| ILMN_1781758 | 3q21.2       | ROPN1B       | 1.636828911  | 6.44E-11                       | 0.078094634       | 0.763868135                      | 1.595439593   | 5.09E-08                        |
| ILMN_1780799 | 8q24.1       | ENPP2        | 1.707714414  | 5.06E-06                       | 0.327647641       | 0.395114959                      | 1.680884421   | 0.000104187                     |
| ILMN_2373791 | 8q24.1       | ENPP2        | 1.707933561  | 6.62E-06                       | 0.358956114       | 0.354138992                      | 1.649444827   | 0.000181608                     |
| ILMN_1741404 | 8q21         | MSC          | 1.713599687  | 2.22E-06                       | -0.045935557      | 0.850037685                      | 1.982108139   | 8.39E-06                        |
| ILMN_3268403 | 19q13.43     | LOC100128252 | 1.73596967   | 2.65E-15                       | 0.063595835       | 0.808209561                      | 1.607147123   | 8.90E-11                        |
| ILMN_1726460 | 3p22-p21.2   | RPL14        | 1.810952692  | 2.66E-13                       | 0.420072629       | 0.104764819                      | 1.442303419   | 1.34E-07                        |
| ILMN_1703572 | 13q21        | PCDH20       | 1.814353409  | 1.06E-06                       | 0.178842659       | 0.464299956                      | 1.481972865   | 0.004839451                     |
| ILMN_3307906 | 1p22-p21     | PALMD        | 1.961562592  | 3.74E-08                       | -0.006321993      | 0.968956764                      | 2.054763961   | 1.24E-06                        |
| ILMN_2344120 | 3q21.2       | ROPN1B       | 1.966947982  | 5.29E-11                       | 0.202607827       | 0.553888801                      | 1.843453117   | 7.49E-08                        |
| ILMN_1668766 | 3q21.1       | ROPN1        | 2.0412616    | 4.86E-11                       | 0.156561029       | 0.632441945                      | 1.953367657   | 2.93E-08                        |
| ILMN_2166457 | 4q34-q35     | HPGD         | 2.082430064  | 4.76E-10                       | 0.007126048       | 0.967369229                      | 2.047051746   | 6.91E-07                        |
| ILMN_1733860 | 3p14.2       | SYNPR        | 2.295113339  | 1.43E-07                       | 0.418079902       | 0.312398369                      | 2.034535612   | 5.53E-05                        |
| ILMN_1749875 | 12p13.31     | LOC728715    | 2.403788128  | 7.54E-08                       | 1.172083628       | 0.006374597                      | 1.622884723   | 0.001103957                     |
| ILMN_2374449 | 4q22.1       | SPP1         | 2.557887027  | 3.52E-05                       | -0.560528642      | 0.432466398                      | 3.204139236   | 3.00E-05                        |
| ILMN_1651354 | 4q22.1       | SPP1         | 2.607482094  | 7.67E-05                       | -0.709302937      | 0.426138115                      | 3.293710762   | 7.04E-05                        |

**Supplementary Table S3: Distribution of chromosomal imbalances over the three expression classes**

| Aberration     | Total (64) | Class I<br>(25) | Class IIa<br>(14) | Class IIb<br>(25) | Class I<br>vs. II | Class I vs.<br>IIa | Class IIa<br>vs. IIb | Class I vs<br>IIb |
|----------------|------------|-----------------|-------------------|-------------------|-------------------|--------------------|----------------------|-------------------|
| 8q             |            |                 |                   |                   |                   |                    |                      |                   |
| -Normal        | 14         | 13              | 1                 | 0                 | $p < 0.0001$      | $p = 0.005$        | $p = 0.148^*$        | $p < 0.0001$      |
| -Trisomy       | 23         | 8               | 7                 | 8                 | $p = 0.001$       | $p = 0.013^*$      | $p = 0.228^*$        | $p = 0.001^*$     |
| -Amplification | 27         | 4               | 6                 | 17                | $p = 0.001$       | $p = 0.069^*$      | $p = 0.126$          | $p = 0.0002$      |
| Monosomy 3     | 41         | 3               | 13                | 25                | $p < 0.0001$      | $p < 0.0001$       | $p = 0.148$          | $p < 0.0001$      |
| Gain 6p        | 43         | 23              | 8                 | 12                | $p = 0.001$       | $p = 0.01^*$       | $p = 0.584$          | $p = 0.001$       |
| Loss 1p36      | 37         | 15              | 8                 | 14                | $p = 0.777$       | $p = 0.862$        | $p = 0.945$          | $p = 0.774$       |
| Loss 16q       | 21         | 9               | 2                 | 10                | $p = 0.664$       | $p = 0.134^*$      | $p = 0.083^*$        | $p = 0.771$       |

\*Likelihood ratio's
